# Supplementary material for: Igf2bp3 maintains maternal RNA stability and ensures early embryo development in zebrafish
Source: PubMed Central journal article supplement (PMC7054421; doi:10.1038/s42003-020-0827-2), 2020-03-03
Supplement: 42003_2020_827_MOESM2_ESM.pdf [file 42003_2020_827_MOESM2_ESM.pdf]

## **Description of Additional Supplementary Files**

**Supplementary Data 1.** The data of RNA-seq (Wild-type and *igf2bp3* mutant embryos) and Igf2bp3-HA RIP-seq .

**Supplementary Data 2.** The source data used for the following Figures:

Fig.1d

Fig. 5b

Fig. 6b,6c

Supplementary Figure 1

Supplementary Figure 3f, 3l

Supplementary Figure 8
